# Supplementary material for: Genes Encoding Cher-TPR Fusion Proteins Are Predominantly Found in Gene Clusters Encoding Chemosensory Pathways with Alternative Cellular Functions
Source: PLoS One. 2012 Sep 20;7(9):e45810. doi: 10.1371/journal.pone.0045810 (PMC3447774; doi:10.1371/journal.pone.0045810)
Supplement: Table S3 — Analysis of total TPR proteins encoded by the CheR-TPR containing genomes. (XLS) [file pone.0045810.s008.xls]

## Sheet: Hoja1
			r		Table S3
					BACTERIAL SPECIES	Total genes per genome	Total TPR containig genes per genome	Rel. abundance of TPR containing genes per genoms (% )	Chemoreceptor-TPR fusion proteins	TPR genes involved in gliding, AglT and AgmK homologs		TPR genes involved in typeIV pili mediate taxis PilF homologs	Other TPR genes of interest
					Arthrospira maxima CS-328	5728	87	1.51885	1	no	no	no	Guanylate cyclase	Guanylate cyclase	Ser-Thr protein kinase	Thioredoxin	Heat-shock protein	Guanylate cyclase	Ser-Thr protein kinase	Ser-Thr protein kinase
					Arthrospira platensis NIES-39	6676	92	1.37807	2	no	no	no		Heat-shock protein	Ser-Thr protein kinase	Protein kinase	Heat-shock protein	Two component response regulator	Ser-Thr protein kinase	Thioredoxin	Guanylate cyclase	Ser-Thr protein kinase	Ser-Thr protein kinase	Two component response regulator	Ser-Thr protein kinase	Ser-Thr protein kinase
					Chloroflexus aggregans (strain MD-66 / DSM 9485)	3904	24	0.614754	0	no	no	no	Guanylate cyclase	Transcriptional regulator	Transcriptional activator	Thioredoxin	Transcriptional regulator	Transcriptional regulator	Guanylate cyclase	Transcriptional activator	Guanylate cyclase	Transcriptional activator	Guanylate cyclase	Ser-Thr protein kinase	Heat-shock protein	Transcriptional activator
					Chloroflexus aurantiacus (strain ATCC 29366 / DSM 635 / J-10-fl)	3990	27	0.676692	0	no	no	no	Guanylate cyclase	Regulatory protein LuxR	Transcriptional activator	Thioredoxin	Protein kinase	Guanylate cyclase	Regulatory protein LuxR	Transcriptional activator	Response regulator receiver	Transcriptional activator	Guanylate cyclase	Guanylate cyclase	Heat-shock protein
					Chloroflexus aurantiacus (strain ATCC 29364)	4308	28	0.649954	0	no	no	no	Transcriptional regulator	Transcriptional regulator	Ser-Thr protein kinase	Thioredoxin	Transcriptional regulator	Guanylate cyclase	Guanylate cyclase	Transcriptional activator	Transcriptional regulator	Transcriptional activator	Transcriptional activator	Transcriptional regulator	Heat-shock protein	Transcriptional regulator
					Roseiflexus castenholzii (strain DSM 13941 / HLO8)	4509	40	0.887115	0	no	no	no	Transcriptional regulator	Heat-shock protein	Transcriptional activator	Thioredoxin	Transcriptional regulator	Transcriptional regulator	Ser-Thr protein kinase	Ser-Thr protein kinase	Transcriptional regulator	Two component transcriptional regulator		Transcriptional regulator	Heat-shock protein	Response regulator receiver	Guanylate cyclase
					Roseiflexus sp. (strain RS-1)	4682	47	1.00384	0	no	no	no	Transcriptional regulator	Heat-shock protein	Transcriptional activator	Protein kinase	Protein kinase	Guanylate cyclase	Protein kinase	Thioredoxin	Response regulator receiver	Two component transcriptional regulator	Transcriptional activator	Response regulator receiver	Protein kinase	Response regulator receiver
					Nostoc punctiforme (strain ATCC 29133 / PCC 73102)	7164	89	1.24232	1	no	no	no	Transcriptional regulator	Heat-shock protein	Ser-Thr protein kinase		Multisensor protein kinase	Multisensor protein kinase	Ser-Thr protein kinase	Ser-Thr protein kinase		Two component transcriptional regulator	Ser-Thr protein kinase		Heat-shock protein
					Cyanothece sp. CCY0110	6520	47	0.720859	1	no	no	no			Ser-Thr protein kinase			Two component response regulator	Ser-Thr protein kinase			Two component transcriptional regulator		Two component response regulator
					Cyanothece sp. (strain PCC 8801)	4619	48	1.03919	1	no	no	no		Heat-shock protein	Ser-Thr protein kinase	Thioredoxin						Two component transcriptional regulator
					Cyanothece sp. (strain PCC 8802)	4700	48	1.02128	1	no	no	no		Heat-shock protein	Ser-Thr protein kinase	Thioredoxin	Transcriptional regulator					Two component transcriptional regulator
					Cyanothece sp. (strain PCC 7822)	7042	72	1.02244	1	no	no	no		Heat-shock protein	Ser-Thr protein kinase	Thioredoxin	Transcriptional regulator	Nucleoside phosphorylase	Phosphatase	Sensor protein	Heat-shock protein	Two component transcriptional regulator	Ser-Thr protein kinase	Ser-Thr protein kinase
					Oscillatoria sp. PCC 6506	5965	90	1.5088	1	no	no	no		Heat-shock protein	Ser-Thr protein kinase		Transcriptional regulator	Guanylate cyclase	Protein kinase	Sensor protein	Transcriptional regulator	Two component transcriptional regulator	Sensor protein	Guanylate cyclase	Sensor protein	Ser-Thr protein kinase	Sensor protein
					Oscillochloris trichoides DG6	3280	34	1.03659	0	no	no	no	Transcriptional regulator	Heat-shock protein	Transcriptional activator	Thioredoxin	Transcriptional regulator	Guanylate cyclase	Guanylate cyclase	Transcriptional activator	Transcriptional activator	Two component transcriptional regulator	Ser-Thr protein kinase	Guanylate cyclase	Transcriptional regulator	Ser-Thr protein kinase	Protein kinase
					Lyngbya sp. (strain PCC 8106) (Lyngbya aestuarii (strain CCY9616))	6185	72	1.16411	1	no	no	no			Ser-Thr protein kinase	Thioredoxin		Guanylate cyclase	Guanylate cyclase	Sensor protein		Two component transcriptional regulator		Two component response regulator
					Crocosphaera watsonii WH 8501	5996	48	0.800534	0	no	no	no		Heat-shock protein		Thioredoxin			Regulatory protein LuxR
					Magnetococcus sp. (strain MC-1)	3815	42	1.10092	0	no	no	no			Ser-Thr protein kinase	Thioredoxin	Transcriptional regulator	Guanylate cyclase	Ser-Thr protein kinase	Ser-Thr protein kinase		Two component transcriptional regulator		Guanylate cyclase
					Magnetospirillum magneticum (strain AMB-1 / ATCC 700264)	4613	36	0.780403	0	no	no	no			Protease	Thioredoxin	Oxidoreductase	Protease	Response regulator
					Azospirillum sp. (strain B510)	6420	49	0.76324	0	no	no	no	Ribosomal methyltransferase	Methyltransferase no CheR	Protease	Thioredoxin	Transcriptional regulator	Guanylate cyclase
					Rhizobium loti	7333	35	0.477294	0	no	no	no	Sigma 70-TPR	Sigma 70-TPR	Protease	Thioredoxin	Transcriptional regulator	Two component response regulator	Guanylate cyclase	Adenylate cyclase	Transcriptional regulator	Signal transduction		Guanylate cyclase
					Methylobacterium extorquens	4956	11	0.221953	0	no	no	no		Methyltransferase no CheR		Thioredoxin
					Methylobacterium extorquens (strain DSM 5838 / DM4)	6030	12	0.199005	0	no	no	no		Methyltransferase no CheR		Thioredoxin
					Methylobacterium extorquens (strain ATCC 14718 / DSM 1338 / AM1)	6345	13	0.204886	0	no	no	no	Exonuclease	Methyltransferase no CheR	Methyltransferase no CheR	Thioredoxin	Response regulator
					Methylobacterium radiotolerans (strain ATCC 27329)	6626	12	0.181105	0	no	no	no		Methyltransferase no CheR	Guanylate cyclase	Thioredoxin	Two component transcriptional regulator	Transcriptional regulator	Two component transcriptional regulator		Two component transcriptional regulator
					Methylobacterium populi (strain ATCC BAA-705)	5546	14	0.252434	0	no	no	no		Methyltransferase no CheR		Thioredoxin	Transcriptional regulator
					Methylobacterium chloromethanicum (strain CM4 / NCIMB 13688)	5853	11	0.187938	0	no	no	no		Methyltransferase no CheR		Thioredoxin	Transcriptional regulator
					Burkholderia ambifaria (strain MC40-6)	6886	20	0.290444	0	no	no	no	Sigma 54-TPR		Protease	Thioredoxin	Transcriptional regulator	Transcriptional regulator	Two component transcriptional regulator	Ser-Thr protein kinase	Transcriptional regulator	Two component transcriptional regulator	Transcriptional regulator	Guanylate cyclase
					Burkholderia ambifaria (strain ATCC BAA-244 / AMMD)	6717	18	0.267977	0	no	no	no	Type II-III secretion system protein		Protease	Thioredoxin	Transcriptional regulator	Transcriptional regulator	Two component transcriptional regulator	Ser-Thr protein kinase	Transcriptional regulator	Two component transcriptional regulator	Transcriptional regulator	Guanylate cyclase
					Burkholderia cenocepacia (strain AU 1054)	6632	16	0.241255	0	no	no	no			Protease	Thioredoxin		Transcriptional regulator	Two component transcriptional regulator	Ser-Thr protein kinase	Transcriptional regulator
					Burkholderia cenocepacia (strain MC0-3)	7173	17	0.237	0	no	no	no	Protease	Transcriptional regulator	Protease	Thioredoxin		Transcriptional regulator	Two component transcriptional regulator	Ser-Thr protein kinase
					Burkholderia cenocepacia (strain HI2424)	7032	16	0.227531	0	no	no	no	Protease	Transcriptional regulator	Protease	Thioredoxin	Transcriptional regulator		Two component transcriptional regulator	Ser-Thr protein kinase
					Burkholderia mallei (strain SAVP1)	5290	12	0.226843	0	no	no	no	Protein kinase	Transcriptional regulator		Thioredoxin	Transcriptional regulator	Response regulator
					Burkholderia mallei (strain NCTC 10229)	5623	12	0.213409	0	no	no	no	Protein kinase	Transcriptional regulator			Transcriptional regulator	Response regulator
					Burkholderia mallei (strain NCTC 10247)	5925	12	0.202532	0	no	no	no	Protein kinase	Transcriptional regulator			Response regulator	Response regulator
					Burkholderia mallei FMH	5846	7	0.11974	0	no	no	no		Transcriptional regulator						Ser-Thr protein kinase	Transcriptional regulator
					Burkholderia mallei ATCC 10399	5836	11	0.188485	0	no	no	no	Protein kinase	Transcriptional regulator	Response regulator		Transcriptional regulator	Response regulator
					Burkholderia multivorans (strain ATCC 17616 / 249)	6306	15	0.237869	0	no	no	no	Pilus assembly protein	Transcriptional regulator	Response regulator	Thioredoxin	Transcriptional regulator
					Burkholderia multivorans CGD2M	6735	12	0.178174	0	no	no	no		Transcriptional regulator		Thioredoxin	Transcriptional regulator
					Burkholderia multivorans CGD1	6650	11	0.165414	0	no	no	no	Protease	Transcriptional regulator		Thioredoxin	Transcriptional regulator
					Burkholderia multivorans CGD2	6735	12	0.178174	0	no	no	no		Transcriptional regulator		Thioredoxin	Transcriptional regulator
					Burkholderia pseudomallei (strain 668)	7194	16	0.222408	0	no	no	no	Protein kinase	Transcriptional regulator	Response regulator	Thioredoxin		Response regulator	Type III secretion protein		Type III secretion protein
					Burkholderia pseudomallei (strain 1106a)	7255	16	0.220538	0	no	no	no		Transcriptional regulator	Response regulator	Thioredoxin	Transcriptional regulator	Response regulator	Type III secretion protein	Ser-Thr protein kinase	Type III secretion protein
					Burkholderia pseudomallei 1106b	7281	16	0.21975	0	no	no	no		Transcriptional regulator	Response regulator	Thioredoxin	Transcriptional regulator	Response regulator	Type III secretion protein	Ser-Thr protein kinase	Type III secretion protein
					Burkholderia pseudomallei 305	8020	15	0.187032	0	no	no	no		Transcriptional regulator	Response regulator			Response regulator	Type III secretion protein	Ser-Thr protein kinase	Type III secretion protein
					Burkholderia pseudomallei S13	7335	14	0.190866	0	no	no	no		Transcriptional regulator	Response regulator	Thioredoxin	Transcriptional regulator		Type III secretion protein		Type III secretion protein
					Burkholderia pseudomallei 576	7459	16	0.214506	0	no	no	no	Transcriptional regulator	Transcriptional regulator	Response regulator	Thioredoxin	Transcriptional regulator	Ser-Thr protein kinase	Type III secretion protein	Ser-Thr protein kinase	Type III secretion protein	Transcriptional regulator
					Burkholderia pseudomallei Pakistan 9	7557	15	0.198491	0	no	no	no		Transcriptional regulator	Response regulator	Thioredoxin		Response regulator	Type III secretion protein	Ser-Thr protein kinase	Type III secretion protein
					Burkholderia pseudomallei MSHR346	7658	16	0.208932	0	no	no	no	Protein kinase	Transcriptional regulator	Response regulator	Thioredoxin		Response regulator	Type III secretion protein		Type III secretion protein
					Burkholderia pseudomallei 1710a	7593	16	0.21072	0	no	no	no		Transcriptional regulator	Response regulator	Thioredoxin	Transcriptional regulator	Response regulator	Type III secretion protein	Ser-Thr protein kinase	Type III secretion protein
					Burkholderia pseudomallei (strain 1710b)	6419	16	0.24926	0	no	no	no	Protein kinase	Transcriptional regulator	Response regulator	Thioredoxin	Response regulator	Response regulator	Type III secretion protein		Type III secretion protein
					Burkholderia phymatum (strain DSM 17167 / STM815)	7899	26	0.329156	0	no	no	no	Protease	Transcriptional regulator	Transcriptional regulator	Thioredoxin	Transcriptional regulator	Transcriptional regulator	Guanylate cyclase	Transcriptional regulator	Sigma 54 transcriptional regulator	Transcriptional regulator
					Burkholderia phytofirmans (strain DSM 17436 / PsJN)	7484	22	0.29396	0	no	no	no	Protease	PAS sensor	Transcriptional regulator	Thioredoxin	Transcriptional regulator	Transcriptional regulator		Transcriptional regulator	Sigma 54 transcriptional regulator
					Burkholderia thailandensis (strain E264 / ATCC 700388 / DSM 13276 / CIP 106301)	5696	12	0.210674	0	no	no	no	Protease	Protein kinase	Response regulator	Thioredoxin			Type III secretion protein
					Burkholderia vietnamiensis (strain G4 / LMG 22486)	7861	15	0.190815	0	no	no	no	Protease	Transcriptional regulator	Transcriptional regulator	Thioredoxin
					Burkholderia sp. Ch1-1	data not available	28		0			no
													Protease	Transcriptional regulator	Response regulator	Thioredoxin	Response regulator	Response regulator	Guanylate cyclase	Transcriptional activator	Guanylate cyclase	Guanylate cyclase	Guanylate cyclase	Guanylate cyclase
					Ralstonia eutropha (strain JMP134)	6616	14	0.211608	0	no	no	yes	Protease	Transcriptional regulator	Transcriptional regulator	Thioredoxin	Response regulator	Transcriptional activator	Guanylate cyclase			Pilus biogenesis protein	Transcriptional regulator
					Ralstonia eutropha (strain ATCC 17699 / H16 / DSM 428 / Stanier 337)	6702	14	0.208893	0	no	no	yes	Protease	Transcriptional regulator	Type II secretion system protein	Thioredoxin	Response regulator	Transcriptional regulator	Guanylate cyclase			Pilus biogenesis protein
					Cupriavidus taiwanensis (strain R1 / LMG 19424) (Ralstonia taiwanensis (strain LMG 19424)	5896	13	0.220488	0	no	no	yes	Protease	Transcriptional regulator	Type II secretion system protein	Thioredoxin	Response regulator	Transcriptional regulator	Sensor histidine kinase			Pilus biogenesis protein	Transcriptional regulator	Transcriptional regulator	Transcriptional regulator
					Ralstonia metallidurans (strain CH34 / ATCC 43123 / DSM 2839)	6820	14	0.205279	0	no	no	yes	Protease	Transcriptional regulator	General secretion pathway protein	Thioredoxin		Secretion protein			Fimbriae V motility protein
					Ralstonia solanacearum UW551	4501	15	0.333259	0	no	no	yes	Protease		Transcriptional regulator		Response regulator
					Herbaspirillum seropedicae (strain SmR1	4804	19	0.395504	0	no	no	no		Transcriptional regulator	Transcriptional regulator	Thioredoxin		Transcriptional regulator	Transcriptional regulator	Transcriptional activator			Transcriptional regulator
					Polaromonas sp. (strain JS666 / ATCC BAA-500)	5626	14	0.248845	0	no	no	yes	Protease	Ser-Thr protein kinase	Transcriptional regulator		Response regulator
					Janthinobacterium sp. (strain Marseille)	3750	20	0.533333	0	no	no	yes	Protease	Protease	Sigma 70 - TPR		Response regulator
					Achromobacter piechaudii ATCC 43553	5817	18	0.309438	0	no	no	no	Protease				Response regulator
					Bordetella avium (strain 197N)	3502	8	0.228441	0	no	no	no	Protease	Ser-Thr protein kinase	Type II secretion system protein		Response regulator	Methyl-transferase non CheR	Methyl-transferase non CheR	Fibronectin type III protein	Fimbriae V motility protein	Pilus biogenesis protein	Guanylate cyclase
					Sideroxydans lithotrophicus (strain ES-1)	3050	26	0.852459	0	no	no	yes	Protease	Protease	Type II secretion system protein		Kinesin light chain	Transcritpional regulator
					Nitrosospira multiformis (strain ATCC 25196 / NCIMB 11849)	2876	19	0.66064	0	no	no	no
													Protease		Two compontent response regulator	Thioredoxin	Response regulator	Signal transduction response regulator	Regulatory protein		Fimbriae V motility protein
					Pseudomonas aeruginosa C3719	5626	12	0.213295	0	no	no	yes	Protease	Ser-Thr protein kinase	Two compontent response regulator	Thioredoxin	sigma 70 - TPR			Transcriptional regulator				Transcriptional regulator
					Pseudomonas aeruginosa (strain LESB58)	6061	11	0.181488	0	no	no	yes	Protease		Two compontent response regulator	Thioredoxin	sigma 70 - TPR	Response regulator	Regulatory protein	Transcriptional regulator	Pilus biogenesis			Transcriptional regulator
					Pseudomonas aeruginosa (strain UCBPP-PA14)	5977	13	0.2175	0	no	no	yes			Two compontent response regulator	Thioredoxin	sigma 70 - TPR	Transcriptional regulator		Transcriptional regulator	Pilus biogenesis			Transcriptional regulator
					Pseudomonas aeruginosa (strain PA7)	6369	15	0.235516	0	no	no	yes	Protease		Type II secretion system protein	Thioredoxin	Response regulator	Transcriptional regulator	Response regulator	Transcriptional regulator	Pilus biogenesis	Response regulator		Transcriptional regulator
					Pseudomonas entomophila (strain L48)	5275	16	0.303318	0	no	no	yes	Protease		Type II secretion system protein	Thioredoxin	sigma 70 - TPR		Response regulator		Pilus biogenesis	Response regulator
					Pseudomonas putida (strain KT2440)	5516	14	0.253807	0	no	no	yes	Protease		Type II secretion system protein	Thioredoxin	sigma 24 - TPR	Transcriptional regulator	Response regulator	Transcriptional regulator	Pilus biogenesis
					Pseudomonas putida (strain F1 / ATCC 700007)	5403	14	0.259115	0	no	no	yes	Protease		Type II secretion system protein	Thioredoxin	sigma 24 - TPR	Transcriptional regulator	Response regulator		Pilus biogenesis
					Pseudomonas putida (strain GB-1)	5529	15	0.271297	0	no	no	yes	Protease			Thioredoxin					Pilus biogenesis
					Methylococcus capsulatus	3052	14	0.458716	0	no	no	yes
													Protease	Ser-Thr protein kinase	Transcriptional regulator	Response regulator	Heat-shock protein	Protein kinase	Response regulator	Transcriptional regulator	Transcriptional regulator	Protein kinase	Protein kinase	Transcriptional regulator	Esterase	Transcriptional activator
					Anaeromyxobacter sp. (strain Fw109-5)	4562	67	1.46865	0	no	no	no		SAM binding oxidoreductase	Type II secretion system protein	Response regulator	Transcriptional activator
					Geobacter uraniireducens (strain Rf4)	4490	39	0.868597	0	no	no	no	SAM binding oxidoreductase	SAM binding oxidoreductase	Type II secretion system protein	Thioredoxin	Transcriptional activator	RND efflux pump	Response regulator	ABC transporter	Dihydrofolate reductase
					Geobacter bemidjiensis (strain Bem / ATCC BAA-1014 (9 CheRs, 2 con TPR)	4129	40	0.968758	0	no	no	no	Protease	Ser-Thr protein kinase	Transcriptional regulator	Response regulator	Sigma 54 - TPR	Guanylate cyclase	Protease	Transcriptional regulator	Transcriptional regulator	Guanylate cyclase	Guanylate cyclase	Transcriptional regulator
					Desulfatibacillum alkenivorans (strain AK-01)	5359	83	1.5488	0	no	no	no	SAM binding oxidoreductase	Methyltransferase no CheR	Type II secretion system protein	Response regulator
					Geobacter sp. (strain FRC-32)	3901	37	0.948475	0	no	no	no	SAM binding oxidoreductase		Type II secretion system protein	Response regulator	Restriction endonuclease		Transcriptional regulator	ABC transporter	Dihydrofolate reductase
					Geobacter sp. M21	4227	44	1.04093	0	no	no	no	SAM binding oxidoreductase	SAM binding oxidoreductase		Protease	PAS sensor			ABC transporter
					Desulfovibrio salexigens (strain ATCC 14822	3941	48	1.21796	0	no	no	no	Protease	Ser-Thr protein kinase	Transcriptional regulator	Histidine kinase	Heat-shock protein	Guanylate cyclase	Response regulator	Ser-Thr protein kinase	Ser-Thr protein kinase	Ser-Thr protein kinase	Ser-Thr protein kinase	Ser-Thr protein kinase	Ser-Thr protein kinase	Ser-Thr protein kinase	Multisensor multikinase
					Haliangium ochraceum (strain DSM 14365 / JCM 11303 / SMP-2)	6952	111	1.59666	0	no	no	no	Protease	Ser-Thr protein kinase	Transcriptional regulator	FAH domain contaning protein	Sigma 70 - TPR	Guanylate cyclase	Response regulator	Adventurous gliding motility protein	Adventorous gliding motility protein	Response regulator	Cyclic nucleotide binding protein	Social gliding motility protein	Ser-Thr protein kinase	Ser-Thr protein kinase	Ser-Thr protein kinase	Transcriptional regulator	Response regulator
					Myxococcus xanthus (strain DK 1622)	7441	119	1.59925	0	yes	yes	no	Protease	Ser-Thr protein kinase	Transcriptional regulator	FAH domain contaning protein	Sensor protein	Guanylate cyclase	Sensor protein	Adventurous gliding motility protein	Adventorous gliding motility protein		Cyclic nucleotide binding protein	Phosphoesterase	Ser-Thr protein kinase	Ser-Thr protein kinase
					Stigmatella aurantiaca DW4/3-1	8407	206	2.45034	0	yes	yes	no	Protease		Protein kinase	Response regulator
					delta proteobacterium MLMS-1	5468	51	0.932699	0	no	no	no		SAM binding oxidoreductase	Type II secretion system protein			Guanylate cyclase
					delta proteobacterium NaphS2	7282	58	0.796484	0	no	no	no	Protease					Guanylate cyclase
					Syntrophus aciditrophicus (strain SB)	3217	27	0.839291	0	no	no	no
															ABC transporter	Heat shock protein
					Mariprofundus ferrooxydans PV-1	2913	22	0.755235	0	no	no	no	Protease	Transcriptional regulator	Transcriptional regulator
					Dethiosulfovibrio peptidovorans DSM 11002	2517	5	0.198649	0	no	no	no
					Deferribacter desulfuricans (strain DSM 14783 / JCM 11476 / NBRC 101012 / SSM1	2442	19	0.778051	0	no	no	no	Sulfotransferase	Transcriptional regulator	Type II secretion system protein	Ser-Thr protein kinase	Ser-Thr protein kinase	Ser-Thr protein kinase
					bacterium Ellin514	6570	52	0.791476	0	no	no	no	Sulfotransferase	Transcriptional regulator	Type II secretion system protein	Ser-Thr protein kinase	Ser-Thr protein kinase	Ser-Thr protein kinase	Guanylate cyclase	Response regulator	Transcriptional regulator	Transcriptional regulator	Guanylate cyclase
					Chthoniobacter flavus Ellin428	6776	85	1.25443	0	no	no	no
					Parachlamydia acanthamoebae str. Hall's coccus	2842	18	0.633357	0	no	no	no	Sulfotransferase	Transcriptional regulator		Ser-Thr protein kinase
					Heliobacterium modesticaldum (strain ATCC 51547 / Ice1)	3137	5	0.159388	0	no	no	no
